# Supplementary material for: Label-Free Time-Gated Luminescent Detection Method for the Nucleotides with Varying Phosphate Content
Source: Preprints.org preprint supplement (doi:10.20944/preprints201810.0066.v1), 2018-10-03
Supplement: Supplementary file 1 [file supplementary]

# **Label-Free Time-Gated Luminescent Detection Method for the Nucleotides with Varying Phosphate Content**

Kari Kopra,<sup>1,\*</sup> Tanja Seppälä,<sup>1</sup> Dana Rabara,<sup>2</sup> Maria Abreu Blanco,<sup>2</sup> Sakari Kulmala,<sup>3</sup> Matthew Holderfield,<sup>2</sup> and Harri Härmä<sup>1</sup>

<sup>1</sup> Materials Chemistry and Chemical Analysis, University of Turku, Finland

<sup>2</sup> Leidos Biomedical Research, Inc., Frederick National Laboratory for Cancer Research, USA

<sup>3</sup> Laboratory of Analytical Chemistry, Aalto University, Finland

Corresponding Author: kari.kopra@utu.fi

## **SUPPORTING INFORMATION**

### **Table of contents**

#### **Supporting results**

|                             |                                                                 |
|-----------------------------|-----------------------------------------------------------------|
| <b>Fig. S1-S3, Table S1</b> | <b>Probe 1 selection, functionality, and reproducibility</b>    |
| <b>Fig. S4-S8</b>           | <b>Probe 1 and QRET functionality in enzymatic K-Ras assays</b> |
| <b>Fig. S9</b>              | <b>Probe 1 functionality in apyrase inhibition assay</b>        |

#### **Supporting references**

## Supporting results

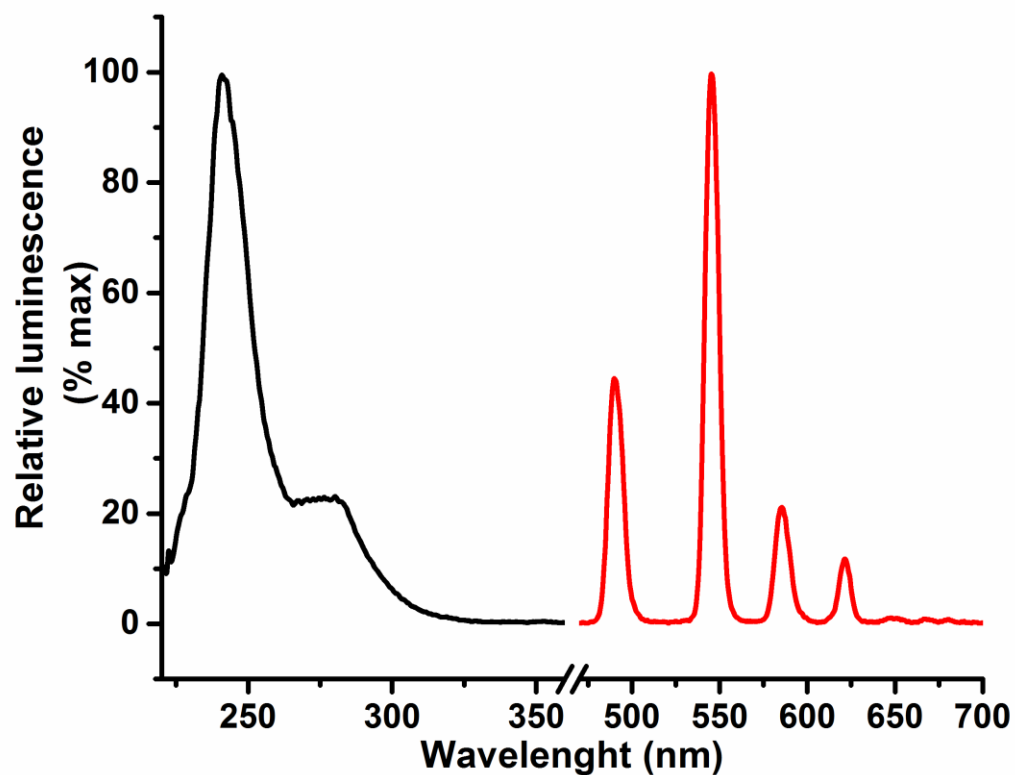

**Fig. S1** Tb(III)-N1-chelate excitation and emission spectra without light harvesting antenna. Tb(III)-N1-chelate excitation (220-400 nm) and emission (400-700 nm) spectra's were measured in the assay buffer 1 (pH 7). Tb(III)-N1-chelate can be excited directly using high energy UV-light (excitation maximum at 240 nm), providing characteristic Tb(III) emission spectra. However, 330 nm excitation wavelength used in the developed assay is not suitable for Tb(III)-N1-chelate excitation without light harvesting antenna. Emission and excitation are separately normalized to Tb(III)-N1-chelate intensity maximum.

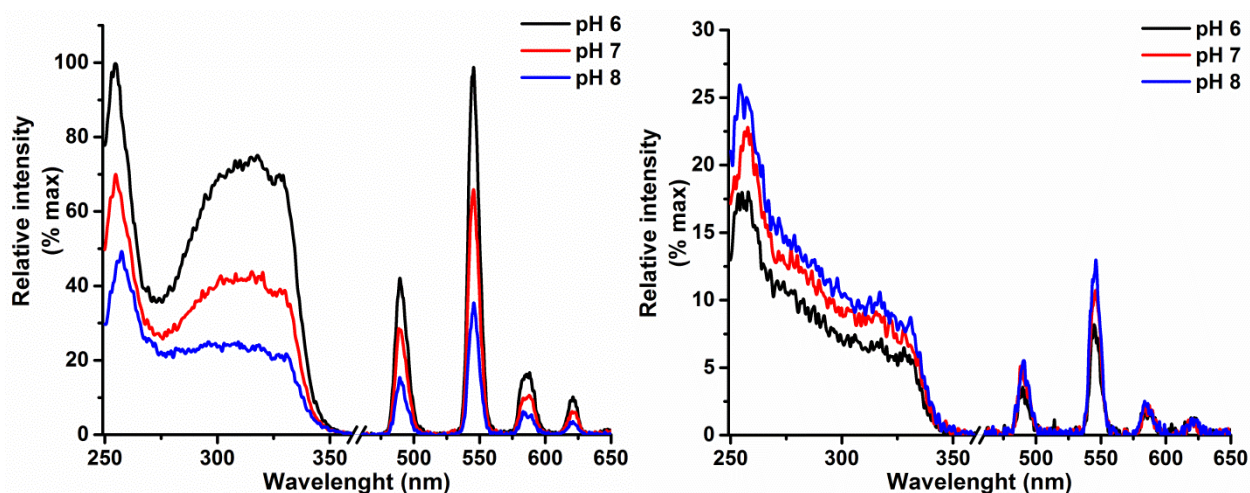

**Fig. S2** Probe 1 excitation and emission spectra at three different pH. Probe 1 excitation (220-400 nm) and emission (400-700 nm) spectra's were measured in the assay buffer 1 set in pH ranging from 6 to 8. Probe 1 responded to pH preferring slightly acidic conditions. Maximum signal is monitored in assay buffer pH 6 (left). Also the response to ATP (10  $\mu$ M) addition is most prominent in the buffer with pH 6 (right). Data indicates that Probe 1 is not efficiently formed in basic solution, but instead prefers neutral or acidic conditions. Emission and excitation are separately normalized to Probe 1 intensity maximum at pH 6.

**Table S1** Functionality of the antenna ligands 1-6 with TbCl<sub>3</sub> and Tb(III)-N1.<sup>a</sup>

| Antenna ligands                                                                                                                                          | Structure                                                                          | 7.5 nM TbCl <sub>3</sub> |                |                | 7.5 nM Tb(III)-N1 |                |                |
|----------------------------------------------------------------------------------------------------------------------------------------------------------|------------------------------------------------------------------------------------|--------------------------|----------------|----------------|-------------------|----------------|----------------|
|                                                                                                                                                          |                                                                                    | S/B,<br>5 min            | S/B,<br>30 min | S/B,<br>90 min | S/B,<br>5 min     | S/B,<br>30 min | S/B,<br>90 min |
| <b>1</b> , 4-hydroxy-6-(trifluoromethoxy)-quinoline-3-carboxylic acid                                                                                    | 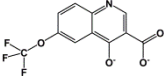  | 55                       | 56             | 50             | 26                | 48             | 47             |
| <b>2</b> , 4-hydroxy-7-methyl-1,8-naphthyridine-3-carboxylic acid                                                                                        |   | 69                       | 67             | 66             | 42                | 62             | 76             |
| <b>3</b> , 1-cyclopropyl-6-fluoro-4-oxo-7-piperazin-1-ylquinoline-3-carboxylic acid                                                                      |   | 5.6                      | 4.5            | 5.1            | 3.7               | 3.7            | 3.6            |
| <b>4</b> , 1,4-dihydro-1-ethyl-7-methyl-1,8-naphthyridin-4-one-3-carboxylic acid, 1-ethyl-1,4-dihydro-7-methyl-4-oxo-1,8-naphthyridine-3-carboxylic acid |   | 109                      | 112            | 93             | 45                | 105            | 113            |
| <b>5</b> , 2-Methyl-7-oxo-4,7-dihydropyrazolo[1,5-a]pyrimidine-6-carboxylic acid                                                                         |   | 25                       | 20             | 22             | 15                | 26             | 33             |
| <b>6</b> , 4-oxo-1,4-dihydroquinoline-3-carboxylic acid                                                                                                  |  | 52                       | 57             | 53             | 27                | 48             | 44             |

<sup>a</sup> Experimental conditions: excitation 330 nm, emission 545 nm, delay 100 μs, decay 200 μs, [Tb(III)-N1 or TbCl<sub>3</sub>] = 7.5 nM, antenna 1-6 = 7.5 μM, GTP = 10 μM, assay buffer 1 [20 mM HEPES, pH 7.5, 1 mM MgCl<sub>2</sub>, 0.01 % Triton-X 100, 0.005 % γ-globulins], n = 3.

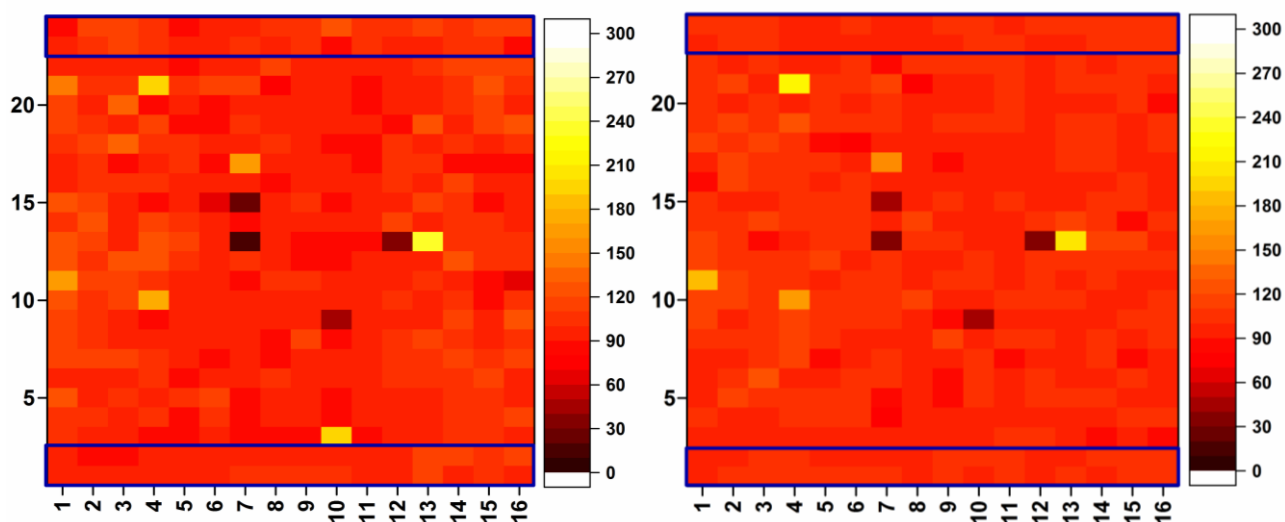

**Fig. S3** Library compound test with Probe 1. Reproducibility and robustness of the assay with Probe 1 was determined with 320 randomly selected small molecule library compounds (20  $\mu\text{M}$ ) with (left) or without (right) 1.5  $\mu\text{M}$  GTP. Used 64 DMSO control wells are lined around in blue. From the 64 controls, we calculated the positive and negative cutoffs (3SD). Using these cutoffs, 2.2-2.5% of compounds increased and 1.9-2.2% decreased the Tb(III)-signal over  $\pm 3\text{SD}$  cutoff. Thus these compounds can be referred as interference in GTP monitoring assay performed with Probe 1. The  $Z'$ -factor calculated from the controls in the plate 1 and 2 was 0.82. Luminescence signals are normalized to Probe 1 average intensity in DMSO control wells.

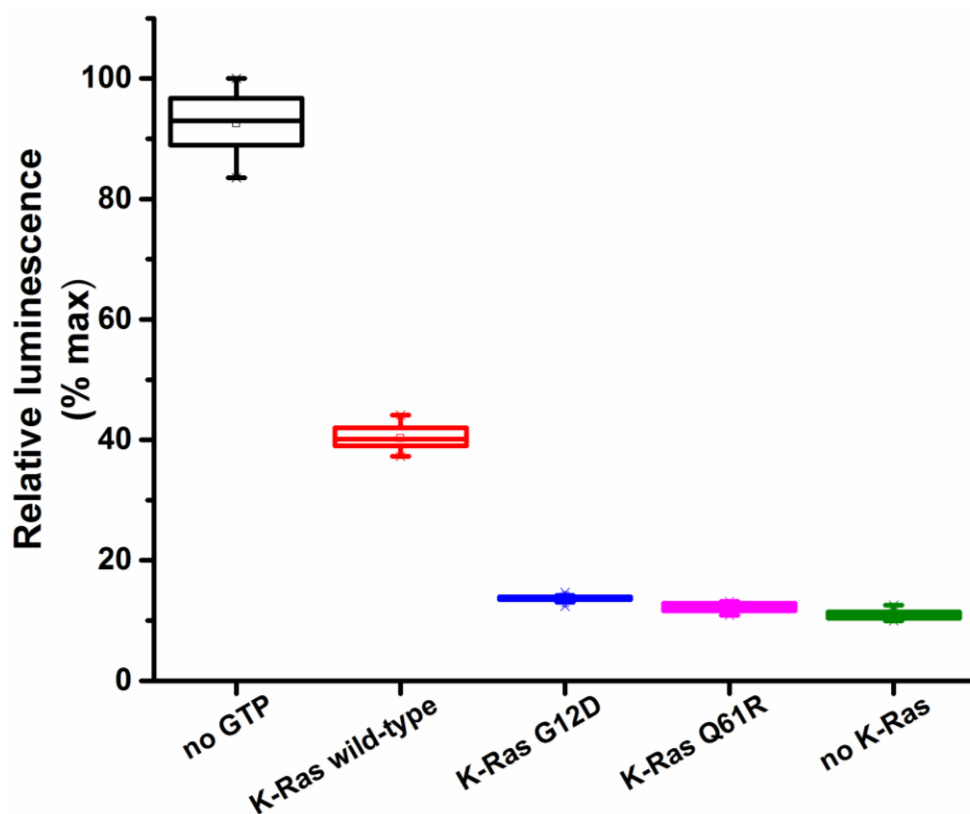

**Fig. S4** Reproducibility of the GTPase cycling assay performed with Probe 1. GTPase cycling assay was performed with wild-type K-Ras and with two K-Ras mutants (G12D and Q61R). As a positive and negative control we used reactions without GTP or K-Ras. In all assays, K-Ras and SOS<sup>cat</sup> were used in 200 nM, p120RasGAP in 100 nM, and GTP in 1.5  $\mu$ M concentration. Time-gated Tb(III)-signals were monitored 60 min after Probe 1 addition. High reproducibility and HTS suitability was monitored for the GTPase cycling assay, when K-Ras wild-type was compared with the two K-Ras mutants ( $Z'$ -factor 0.72-0.73). Data represent mean  $\pm$  SD (n=24).

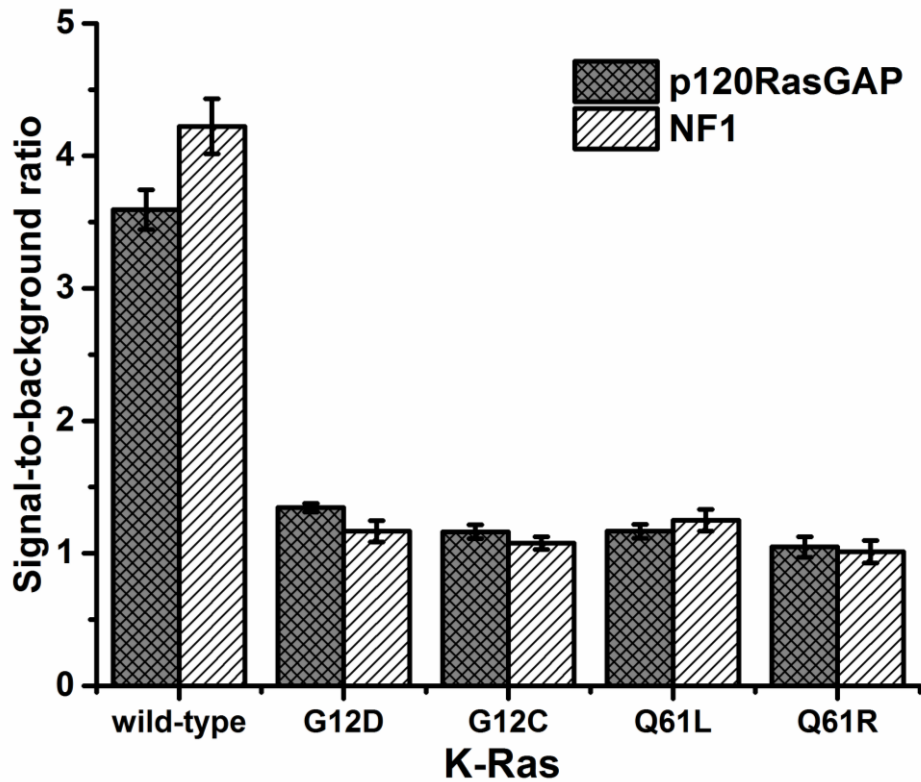

**Fig. S5** QRET based GTPase cycling monitoring. In the assay, GTPase cycle of GDP-GTP exchange and GTP hydrolysis with wild-type K-Ras reduces free GTP concentration, which increases Eu(III)-GTP binding to GTP-specific 2A4<sup>GTP</sup> Fab fragment. GTP hydrolysis is impaired for mutant K-Ras proteins (G12D, G12C, Q61L, and Q61R), resulting in low Eu(III)-luminescence signal due to competition. Assay was performed using 200 nM K-Ras, 1.5  $\mu$ M GTP, 200 nM SOS<sup>cat</sup>, and either with 100 nM p120RasGAP (dark gray) or 100 nM NF1 (light gray). The detection solution added after 60 min reaction contains 7.5 nM Eu(III)-GTP, 12 nM 2A4<sup>GTP</sup>, and 1.8  $\mu$ M MT2. Signal-to-background ratio (S/B) with wild-type K-Ras and K-Ras mutants (G12D, G12C, Q61L, and Q61R) using p120RasGAP were 3.6, 1.3, 1.2, 1.2, and 1.0, respectively. Similarly, with NF1 the S/B ratios were 4.2, 1.2, 1.1, 1.2, and 1.0 for wild-type K-Ras and K-Ras mutants (G12D, G12C, Q61L, and Q61R), respectively. Data represent mean  $\pm$  SD (n=3) at a time point of 15 min.

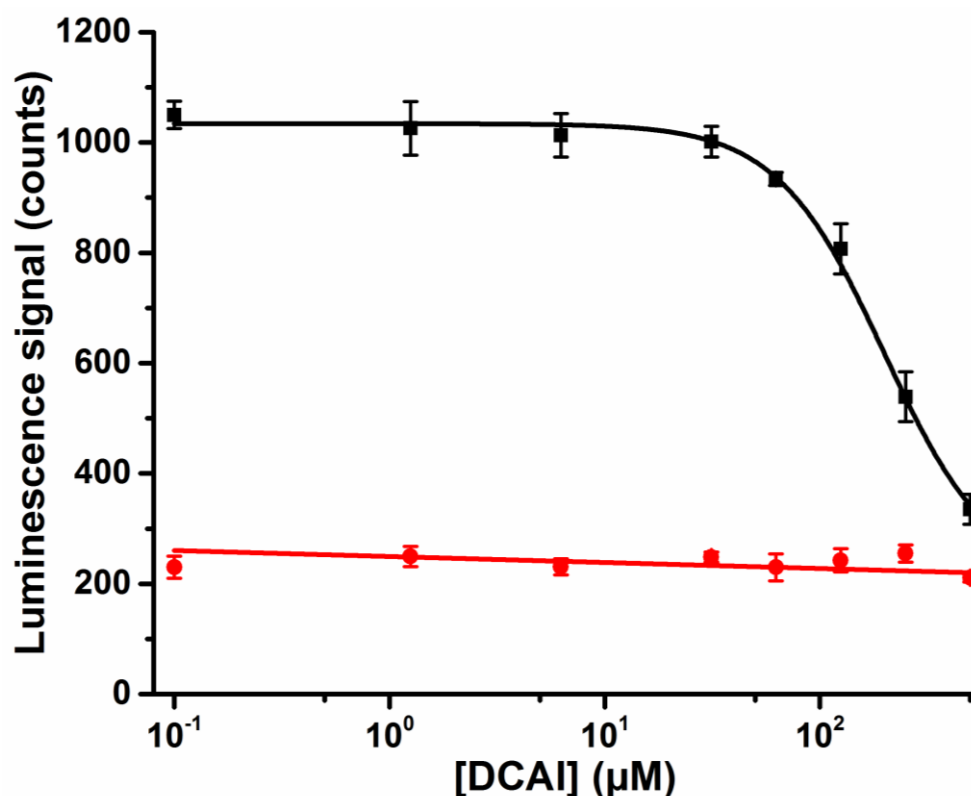

**Fig. S6** DCAI titration using QRET based GTPase cycling assay. In the GTPase cycling assay, wild-type K-Ras reduces free GTP concentration, which increases Eu(III)-GTP binding to 2A4<sup>GTP</sup> Fab fragment. DCAI inhibits SOS<sup>cat</sup> dependent GDP-GTP exchange and thus impairs GTP hydrolysis, resulting in low Eu(III)-luminescence signal due to blocked GTP hydrolysis. Assay was performed using either 200 nM K-Ras wild-type (black) or 200 nM K-Ras Q61R mutant (red), and with 200 nM SOS<sup>cat</sup>, 100 nM p120RasGAP, and 1.5 μM GTP. Detection solution contain 7.5 nM Eu(III)-GTP, 12 nM 2A4<sup>GTP</sup>, and 1.8 μM MT2. S/B ratios for wild-type and Q61R mutant K-Ras were 5.1 and 1.1, respectively. The Q61R mutant K-Ras is hydrolysis dead and thus does not respond to DCAI concentration. In DCAI titration (1.25-500 μM) the calculated IC<sub>50</sub> value with wild-type K-Ras was 199 ± 8 μM [1]. Data represent mean ± SD (n=3) at a time point of 15 min.



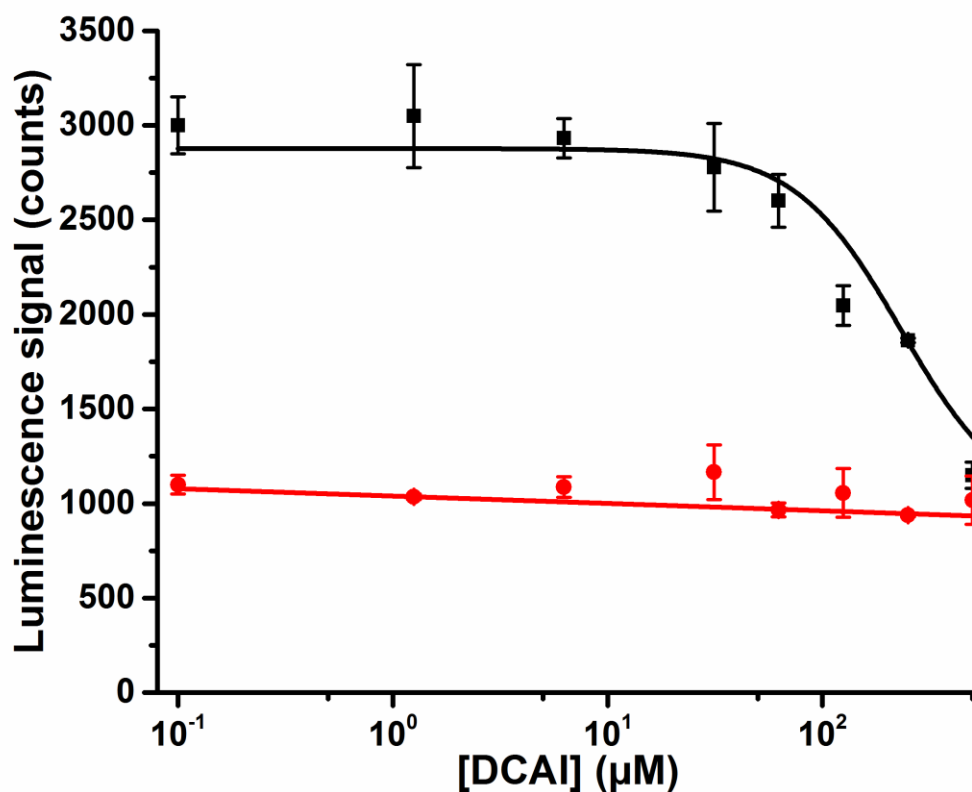

**Fig. S7** DCAI titration using K-Ras nucleotide association assay performed with Probe 1. DCAI titration (1.25-500  $\mu\text{M}$ ) was performed to monitor 500 nM GTP association inhibition to 500 nM K-Ras (wild-type or Q61R mutant) in the presence of nucleotide exchange factor ( $\text{SOS}^{\text{cat}}$ ). Probe 1 monitored GTP, which in the absence of DCAI is bound to K-Ras and its ability to quench the Probe 1 luminescence is impaired. DCAI blocks the GTP association and thus GTP can compete the binding of antenna-ligand in the Probe 1 complex. The calculated  $\text{IC}_{50}$  value with wild-type K-Ras (black) was  $232 \pm 28 \mu\text{M}$  ( $\text{S/B} = 3.0$ ), while no change in Q61R K-Ras mutant (red) signal was detected due to impaired GTP association [1]. Data represent mean  $\pm$  SD ( $n=3$ ).

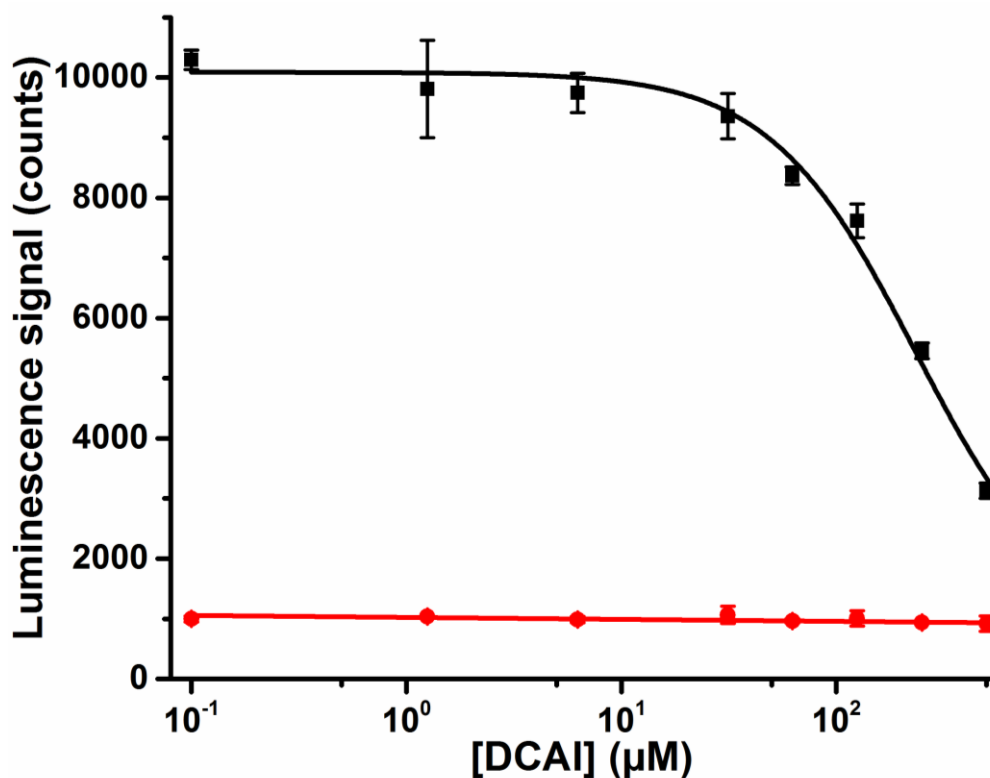

**Fig. S8** DCAI titration using QRET based Eu(III)-GTP association assay. In the assay without inhibitor compound, Eu(III)-GTP association increases Eu(III)-luminescence signal due to K-Ras ability to protect the Eu(III)-signal from the MT2 induced quenching. In the presence of DCAI, Eu(III)-GTP association cannot occur and low Eu(III)-luminescence signal is monitored due to high quenching of the Eu(III)-GTP signal in solution by MT2. Assay was performed using either 200 nM K-Ras wild-type (black) or 200 nM K-Ras Q61R mutant (red), and with 200 nM SOS<sup>cat</sup>, 7.5 nM Eu(III)-GTP, and 1.5 μM MT2. S/B ratios with wild-type K-Ras and Q61R mutant were 10.3 and 1.1, respectively. In DCAI titration (1.25-500 μM) the calculated IC<sub>50</sub> value with wild-type K-Ras was 233 ± 22 μM [1]. Data represent mean ± SD (n=3) in a time point of 30 min.

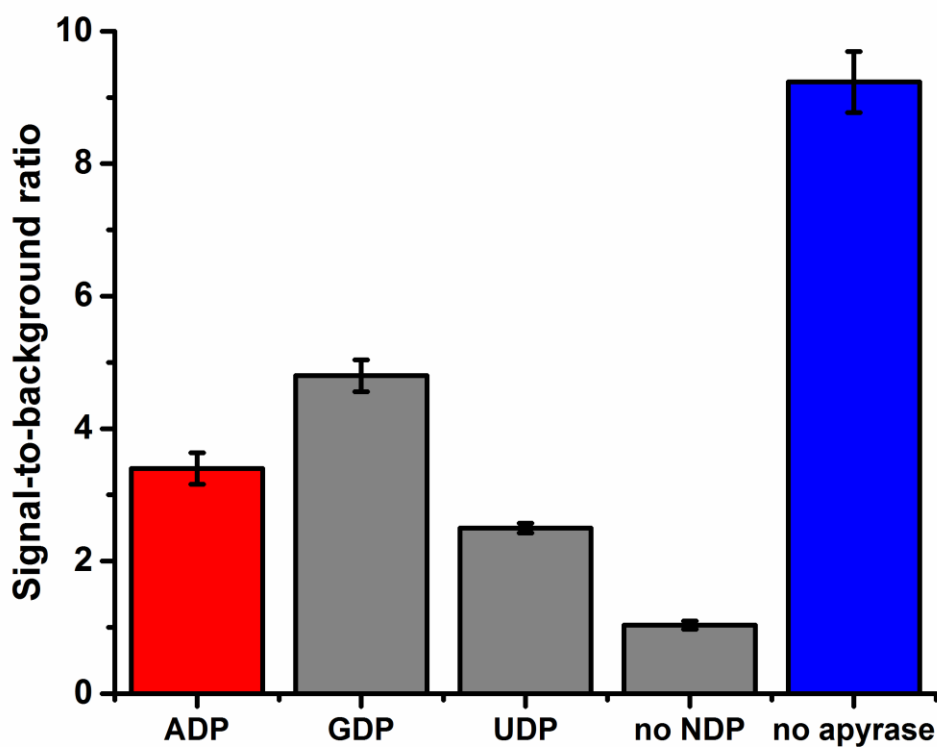

**Fig. S9** Apyrase ability to hydrolyze different nucleotide diphosphates (NDPs). Apyrase ADPase activity and specificity were monitored with single enzyme (200  $\mu$ U) and NDP (50  $\mu$ M) concentrations by using Probe 1 for detection. Enzymatic reaction was incubated for 50 min before detection. Apyrase showed no ADP specificity, but were able to hydrolyze also two other tested NDPs (GDP and UDP). Thus similar nucleotide preference as with NTPs were not monitored with NDPs. Data represent mean  $\pm$  SD (n=3) in a time point of 30 min.

## Supporting references

1. Maurer, T.; Garrenton, L.S.; Oh, A.; Pitts, K.; Anderson, D.J.; Skelton, N.J.; Fauber, B.P.; Pan, B.; Malek, S.; Stokoe, D.; Ludlam, M.J.; Bowman, K.K.; Wu, J.; Giannetti, A.M.; Starovasnik, M.A.; Mellman, I.; Jackson, P.K.; Rudolph, J.; Wang, W.; Fang, G. Small-molecule ligands bind to a distinct pocket in Ras and inhibit SOS-mediated nucleotide exchange activity. *Proc. Natl. Acad. Sci. U.S.A.* **2012**, *109*, 5299–5304.
